# Supplementary material
Source: MDPI journal article supplement (https://www.mdpi.com/2304-6740/8/3/18)
Supplement: s1 [file s1]

# Supplementary Materials: Copper(II) Halide Salts with 1-(4'-Pyridyl)-Pyridinediium

Jeffrey C. Monroe, Christopher P. Landee, Melanie Rademeyer and Mark M. Turnbull

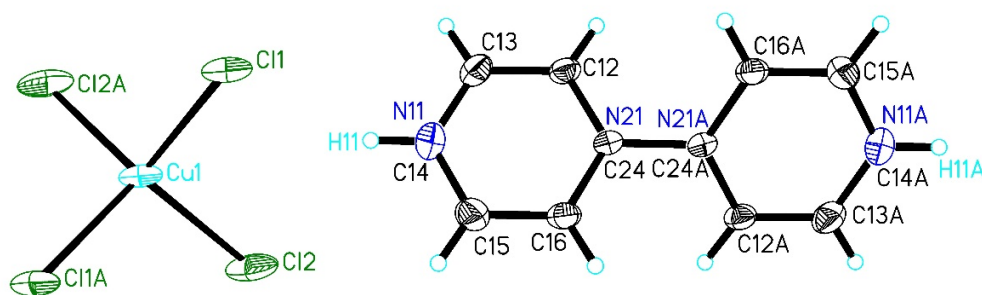

**Figure S1.** The molecular unit of **1** shown as 50% probability thermal ellipsoids; hydrogen atoms are shown as spheres of arbitrary size. Disordered positions are labelled with both atom names.

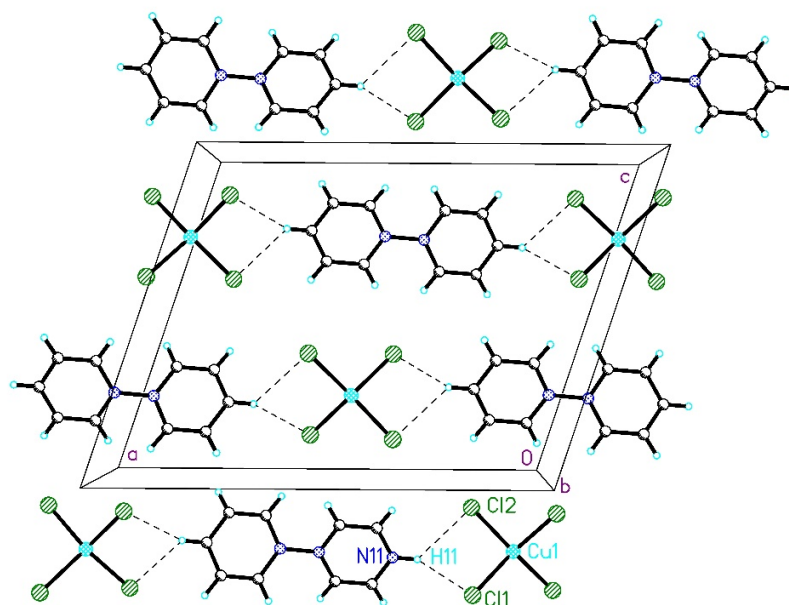

**Figure S2.** Packing of **B1H** and **CuCl<sub>4</sub>** units into a layer in **1** viewed parallel to the *b*-axis.

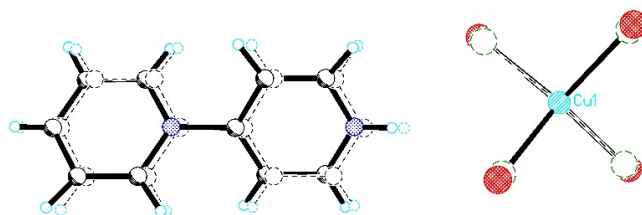

**Figure S3.** The molecular unit of **1** and **2** overlaid via a best fit model using Cu1 as the origin. Components of **1** are shown as dotted circles and dashed bonds.
